# Supplementary material for: A novel smart composite: from self-powered sensors to multi-responsive shape memory actuators
Source: Royal Society of Chemistry journal article supplement (doi:10.1039/d2ta06626b), 2022-01-01
Supplement: d2ta06626b3.pdf [file d2ta06626b3.pdf]

## A novel smart composite: from self-powered sensors to multi-responsive shape memory actuators

Yuqi Li<sup>a,#</sup>, Xi Xie<sup>a,#</sup>, Qixuan Zhu<sup>b</sup>, Shaorong Lu<sup>a</sup>, and Yongkang Bai<sup>\*,b</sup>

a. Key Laboratory of New Processing Technology for Nonferrous Metals and Materials, Ministry of Education, College of Materials Science and Engineering, Guilin University of Technology, Guilin, 541004, China

b. School of Chemical Engineering and Technology, Shaanxi Key Laboratory of Energy Chemical Process Intensification, Institute of Polymer Science in Chemical Engineering, Xi'an Jiaotong University, Xi'an, Shaanxi 710049, PR China;

Corresponding Author: Yongkang Bai, yongkangbai@sina.com

#These authors contributed equally to this work.

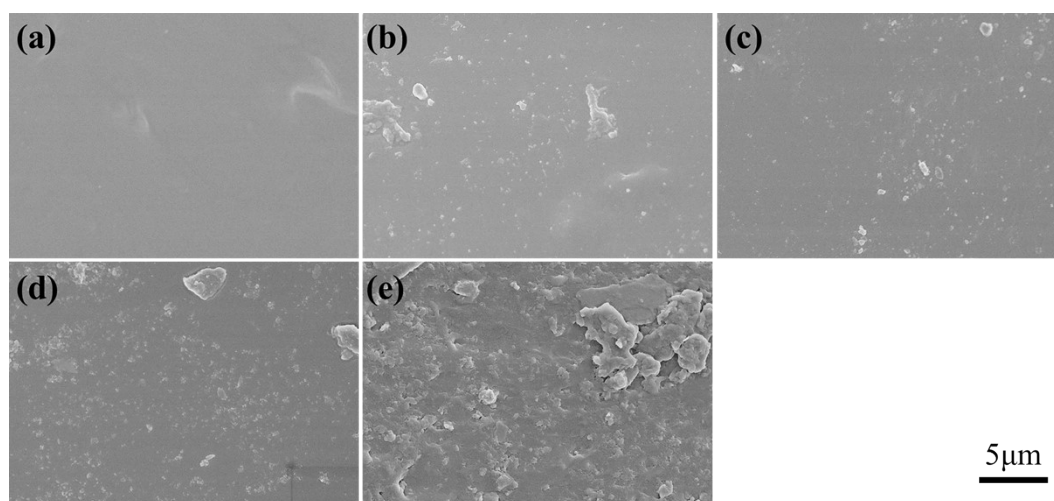

Figure S1 SEM image of (a) AP, (b) APG1, (c) APG2, (d) APG3, and (f) APG4.

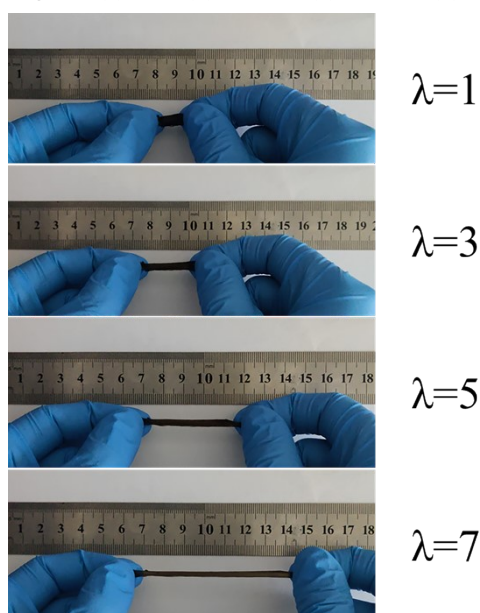

Figure S2 Digital photographs of the APG2 under different strain.

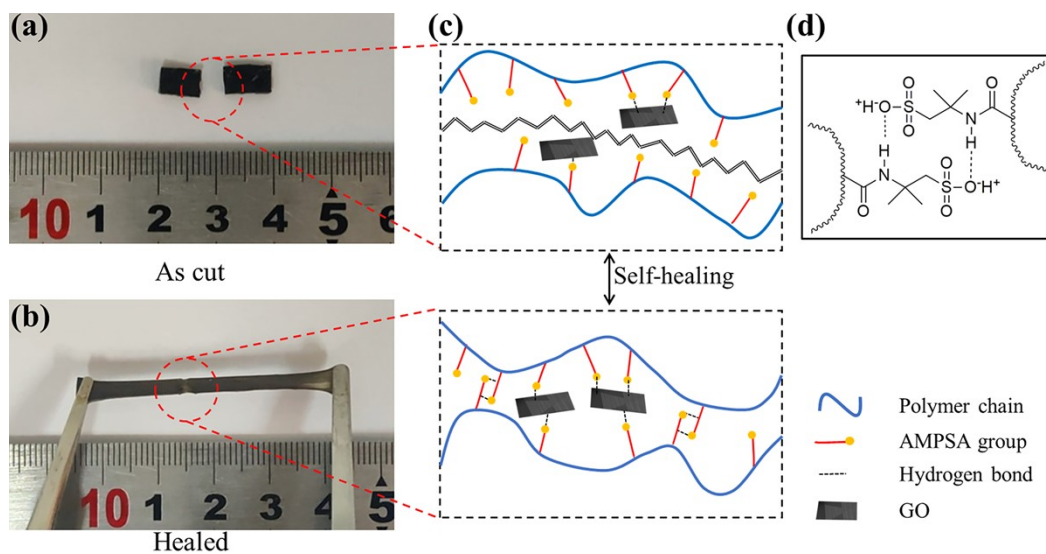

Figure S3 (a) Damaged sample. (b) Healed sample. (c) Schematic illustration of self-healing mechanism. (d) Hydrogen bond interaction of AMPSA groups.

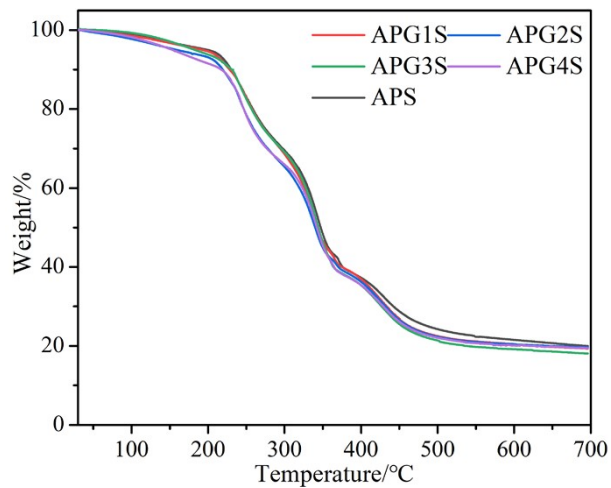

Figure S4 TGA curves of APGxS composites.

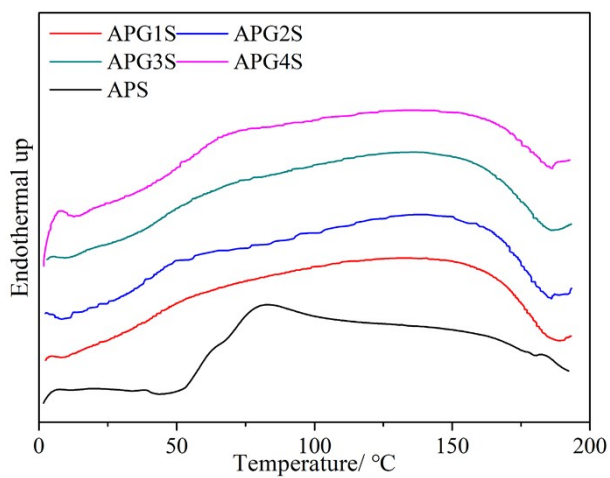

Figure S5 DSC curves of APGxS composites

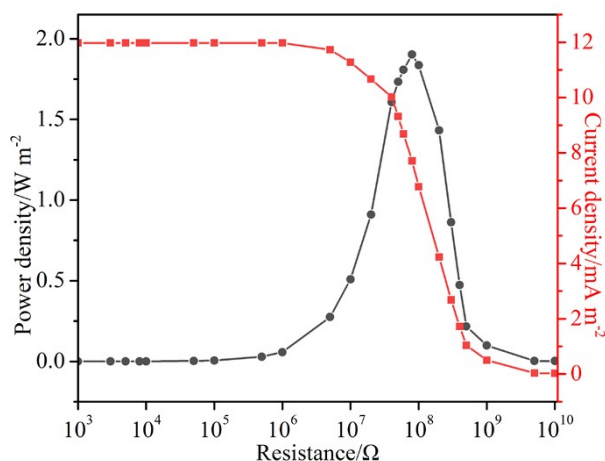

Figure S6 Current and peak power density depending on external resistances of reconstructed H-TENG

Table S1 Composition and mechanical properties of APGx hydrogels

| Sample | GO content (%) | $\sigma$ (MPa) | $\epsilon$ (%) |
|--------|----------------|----------------|----------------|
| AP     | 0              | 0.147±0.004    | 798±84         |
| APG1   | 0.25           | 0.147±0.001    | 887±13         |
| APG2   | 0.5            | 0.242±0.02     | 1179±44        |
| APG3   | 0.75           | 0.203±0.03     | 1009±84        |
| APG4   | 1              | 0.182±0.014    | 953±26         |

Table S2 Mechanical properties, glass transition temperature, thermo- and NIR light-induced shape memory properties of APGxS composites

| sample | $\sigma$ (MPa) | $\epsilon$ (%) | $T_g$ (°C) | $R_f^a$ (%) | $R_r^a$ (%) | $R_f^b$ (%) | $R_r^b$ (%) |
|--------|----------------|----------------|------------|-------------|-------------|-------------|-------------|
| APS    | 26.9±0.9       | 16.7±0.5       | 56.7       | 95.5±2.6    | 87.4±3.3    | /           | /           |
| APG1S  | 30.6±2.3       | 17.5±1.4       | 54.4       | 96.1±1.5    | 95.7±2.2    | 98.1±1.1    | 95.1±1.3    |
| APG2S  | 38.5±1.4       | 19.1±0.8       | 56.9       | 98.8±2.1    | 96.7±2.4    | 97.8±2.2    | 96.5±1.8    |
| APG3S  | 26.0±1.8       | 18.6±0.6       | 54.6       | 98.4±2.3    | 95.2±3.5    | 98.6±1.5    | 95.1±2.7    |
| APG4S  | 24.4±1.5       | 17.2±0.7       | 57.1       | 98.8±2.1    | 94.3±3.4    | 98.4±1.4    | 93.4±2.4    |

Note: a, thermo-induced shape memory properties; b, NIR light-induced shape memory properties.

Table S3 property comparison of hydrogel based TENG reported in recent years

| Materials                  | Self-healing | Self-adhesive | Voltage | Power density                             | Year | Ref. |
|----------------------------|--------------|---------------|---------|-------------------------------------------|------|------|
| PVA/agarose/MWCNT hydrogel | Yes          | N/A           | 95V     | 0.75 W/m <sup>2</sup><br>(500M $\Omega$ ) | 2019 | [1]  |
| PVA hydrogel               | Yes          | N/A           | 20V     | 5 mW/m <sup>2</sup><br>(110M $\Omega$ )   | 2019 | [2]  |
| Chitosan/AgNW hydrogel     | N/A          | N/A           | 182V    | 2 W/m <sup>2</sup>                        | 2019 | [3]  |

|                                  |     |     |      |                                                               |           |      |
|----------------------------------|-----|-----|------|---------------------------------------------------------------|-----------|------|
| PAM/HEC/LiCl hydrogel            | N/A | N/A | 285V | (10.5M $\Omega$ )<br>0.626W/m <sup>2</sup><br>(30M $\Omega$ ) | 2020      | [4]  |
| PNA/PMA hydrogel fiber           | Yes | N/A | 36V  | 88 mW/m <sup>2</sup><br>(200M $\Omega$ )                      | 2020      | [5]  |
| PVA/PAM hydrogel                 | N/A | N/A | 345V | 1.81 W/m <sup>2</sup><br>(10M $\Omega$ )                      | 2021      | [6]  |
| PAM/Clay hydrogel                | Yes | N/A | 157V | 0.71 W/m <sup>2</sup><br>(20M $\Omega$ )                      | 2021      | [7]  |
| PAM/SA/Ca <sup>2+</sup> hydrogel | N/A | N/A | 22V  | 6.79 mW/m <sup>2</sup><br>(700 k $\Omega$ )                   | 2022      | [8]  |
| PHAM/PAA hydrogel                | Yes | Yes | 123V | 0.209 W/m <sup>2</sup><br>(30M $\Omega$ )                     | 2022      | [9]  |
| PVA/PAM/EG hydrogel              | N/A | N/A | 200V | 0.943 W/m <sup>2</sup><br>(100 M $\Omega$ )                   | 2022      | [10] |
| PAA/PA hydrogel                  | N/A | N/A | 201V | 1.33 W/m <sup>2</sup><br>(500 M $\Omega$ )                    | 2022      | [11] |
| ECTFE hydrogel                   | N/A | N/A | 332V | 1.85 W/m <sup>2</sup><br>(1.8 M $\Omega$ )                    | 2022      | [12] |
| PAM/alginate hydrogel            | N/A | N/A | 380V | 5.7 mW/m <sup>2</sup><br>(2400 M $\Omega$ )                   | 2022      | [13] |
| PAMPSA/GO hydrogel               | Yes | Yes | 162V | 2 W/m <sup>2</sup><br>(80M $\Omega$ )                         | This work |      |

## Reference

- [1] Q. Guan, G. Lin, Y. Gong, J. Wang, W. Tan, D. Bao, Y. Liu, Z. You, X. Sun, Z. Wen, Y. Pan, *Journal of Materials Chemistry A* **2019**, 7, 13948.
- [2] Y.-C. Lai, H.-M. Wu, H.-C. Lin, C.-L. Chang, H.-H. Chou, Y.-C. Hsiao, Y.-C. Wu, *Adv. Funct. Mater.* **2019**, 29, 1904626.
- [3] L. Wang, W. A. Daoud, *Nano Energy* **2019**, 66, 104080.
- [4] D. Bao, Z. Wen, J. Shi, L. Xie, H. Jiang, J. Jiang, Y. Yang, W. Liao, X. Sun, *Journal of Materials Chemistry A* **2020**, 8, 13787.
- [5] L. Shuai, Z. H. Guo, P. Zhang, J. Wan, X. Pu, Z. L. Wang, *Nano Energy* **2020**, 78, 105389.
- [6] Y. Wu, J. Qu, X. Zhang, K. Ao, Z. Zhou, Z. Zheng, Y. Mu, X. Wu, Y. Luo, S.-P. Feng, *ACS Nano* **2021**, 15, 13427.
- [7] L.-B. Huang, X. Dai, Z. Sun, M.-C. Wong, S.-Y. Pang, J. Han, Q. Zheng, C.-H. Zhao, J. Kong, J. Hao, *Nano Energy* **2021**, 82, 105724.
- [8] Y. Chen, C. Shi, J. Zhang, Y. Dai, Y. Su, B. Liao, M. Zhang, X. Tao, W. Zeng, *Energy Technology* **2022**, 10, 2200070.
- [9] X. Guo, F. Yang, X. Sun, Y. Bai, G. Liu, W. Liu, R. Wang, X. He, *Adv. Funct. Mater.* **2022**, n/a, 2201230.
- [10] X. Dai, Y. Long, B. Jiang, W. Guo, W. Sha, J. Wang, Z. Cong, J. Chen, B. Wang, W. Hu, *Nano Res.* **2022**, 15, 5461.
- [11] J. Yang, J. An, Y. Sun, J. Zhang, L. Zu, H. Li, T. Jiang, B. Chen, Z. L. Wang, *Nano Energy* **2022**,

97, 107199.

[12] A. Sharma, V. Panwar, B. Mondal, D. Prasher, M. K. Bera, J. Thomas, A. Kumar, N. Kamboj, D. Mandal, D. Ghosh, *Nano Energy* **2022**, 99, 107419.

[13] B. Ying, R. Zuo, Y. Wan, X. Liu, *ACS Applied Electronic Materials* **2022**, 4, 1930.
